# Supplementary material for: scE2EGAE: Enhancing Single-cell RNA-Seq Data Analysis through an End-to-End Cell-Graph-Learnable Graph Autoencoder with Differentiable Edge Sampling
Source: Research Square preprint supplement (doi:10.21203/rs.3.rs-5279794/v1), 2024-10-29
Supplement: Supplementary file 1 [file d5b898bc06d7682d20840c3d.pdf]

Supplementary materials for paper: scE2EGAE: Enhancing  
Single-cell RNA-Seq Data Analysis through an End-to-End  
Cell-Graph-Learnable Graph Autoencoder with Differentiable Edge  
Sampling

Shuo Wang

October 17, 2024

# 1 Hyperparameters used by scE2EGAE and AblationGAE

Table 1: Hyperparameters used in scE2EGAE and AblationGAE. Definitions: **Num\_Epochs** - maximum number of epochs with early-stopping; **Patience** - patience parameter for early-stopping; **K** - number of neighboring cells for edge sampling (in Ablation, it decides the number of neighbors in the KNN algorithm); **Distance\_Measure** - function used to calculate cell-by-cell distances matrix; **AE\_Dim** - dimension of hidden representations in the DCA module (exclusive to scE2EGAE); **GAE\_Dim** - dimension of hidden representations in the graph encoder; **Dropout\_GAE** - dropout rate in the graph encoder’s encoder layer; **LR** - learning rate; **Alpha** - weighting parameter between ZINB loss in DCA module and MSE/MSLE loss in graph encoder (exclusive to scE2EGAE); **MSLE** - indicates whether MSLE loss function is used (True) or MSE loss function is used (False).

| Datasets | Num_Epochs | Patience | K | Distance_Measure | AE_Dim | GAE_Dim | Dropout_GAE | LR    | Alpha  | MSLE  |
|----------|------------|----------|---|------------------|--------|---------|-------------|-------|--------|-------|
| Klein    | 500        | 20       | 3 | Hyperbolic       | 128    | 2000    | 0           | 0.003 | 0.0005 | False |
| Zeisel   | 700        | 20       | 3 | Hyperbolic       | 128    | 2000    | 0.1         | 0.003 | 0.001  | True  |
| Romanov  | 500        | 20       | 3 | Hyperbolic       | 128    | 2000    | 0.1         | 0.003 | 0.0005 | False |
| ITC      | 500        | 20       | 3 | Hyperbolic       | 128    | 2000    | 0.1         | 0.003 | 0.001  | False |
| Chu      | 2000       | 20       | 3 | Euclidean        | 128    | 2000    | 0           | 0.003 | 0.001  | False |
| ILC      | 4000       | 10       | 1 | Hyperbolic       | 128    | 2000    | 0           | 0.003 | 0.001  | False |
| Tirosh   | 800        | 10       | 1 | Hyperbolic       | 128    | 128     | 0           | 0.003 | 0.001  | False |
| AD       | 1500       | 20       | 1 | Hyperbolic       | 128    | 64      | 0           | 0.003 | 0.001  | False |

## 2 UMAP visualization for the masked datasets

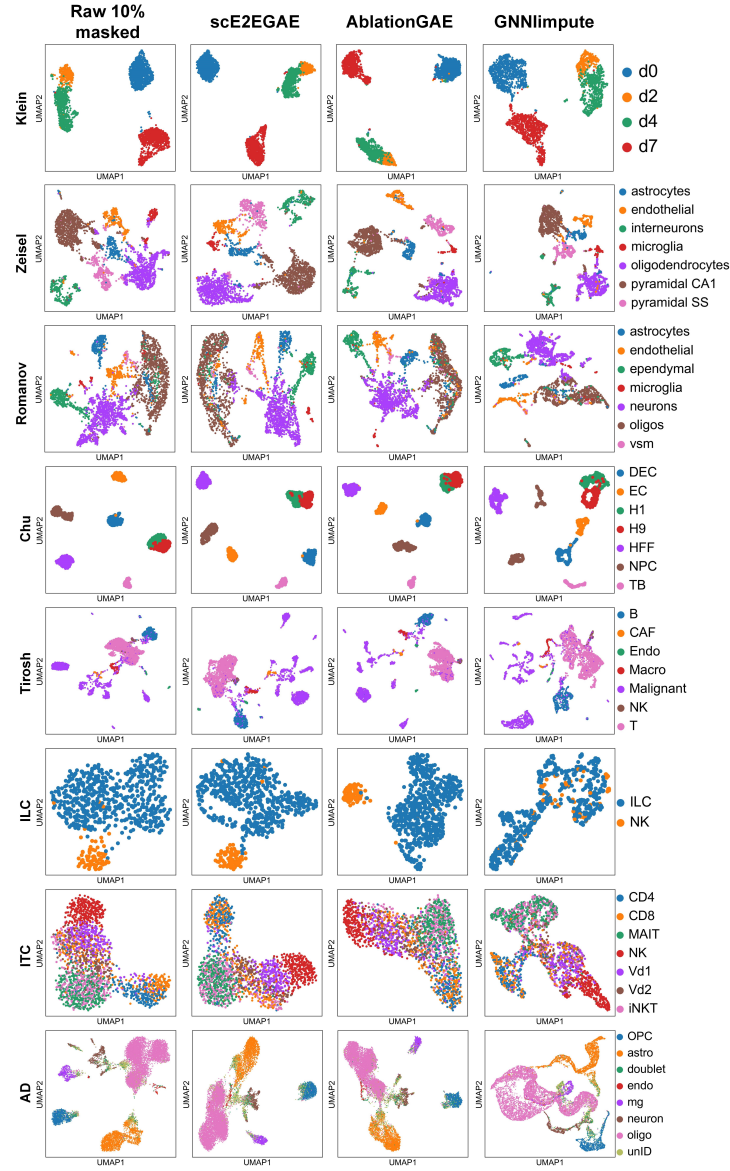

Figure 1: UMAP visualization of denoising results of scE2EGAE, AblationGAE, and GNNImpute on eight scRNA-Seq datasets with 10% masking rate. All of the results undergo dimensionality reduction to 40 dimensions, and the number of neighbors is set to 30.

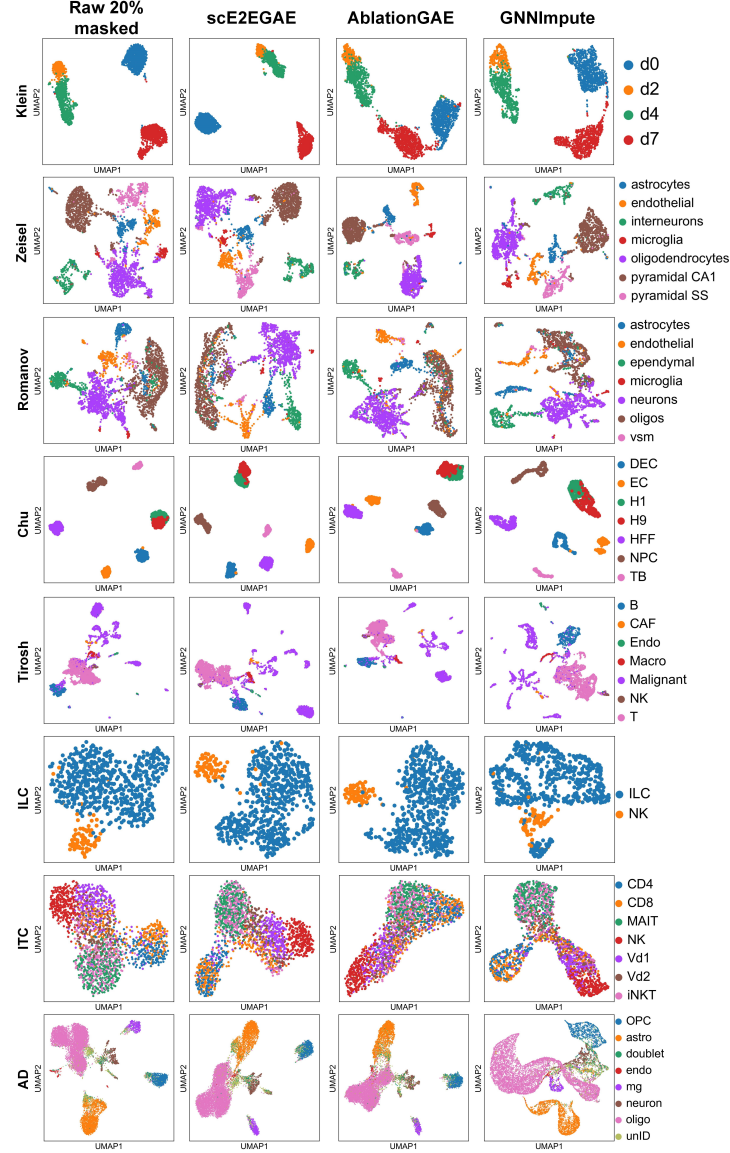

Figure 2: UMAP visualization of denoising results of scE2EGAE, AblationGAE, and GNNImpute on eight scRNA-Seq datasets with 20% masking rate. All of the results undergo dimensionality reduction to 40 dimensions, and the number of neighbors is set to 30.



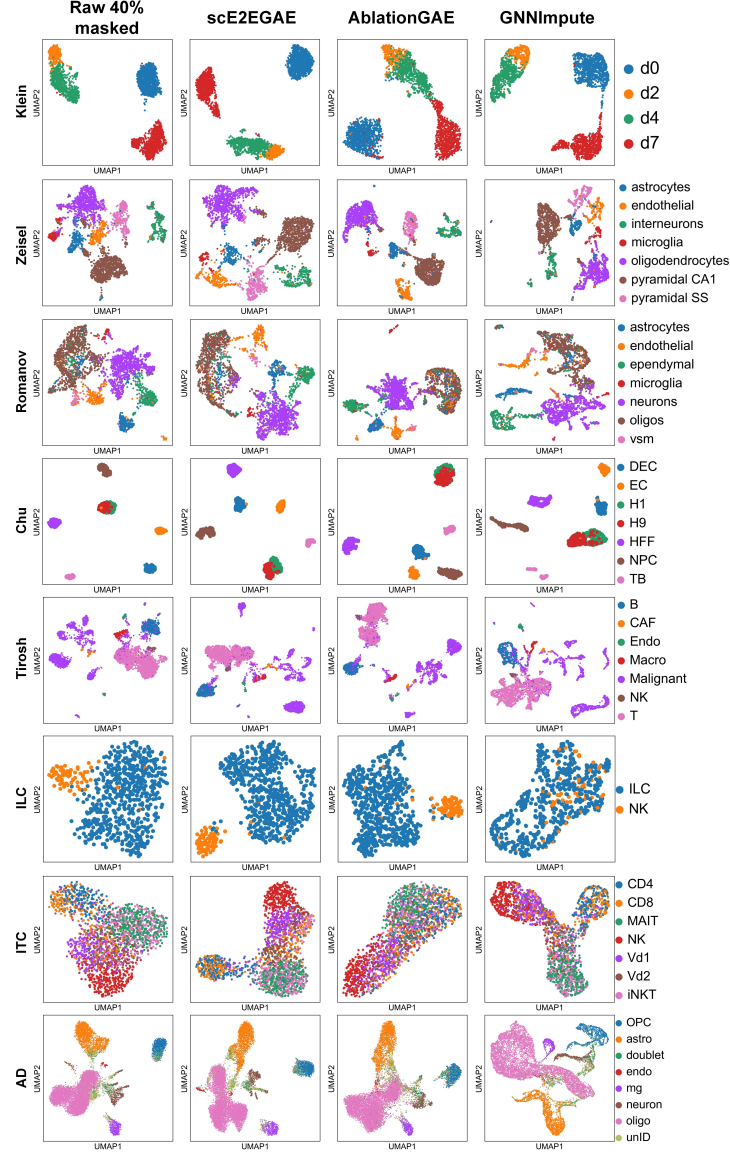

Figure 3: UMAP visualization of denoising results of scE2EGAE, AblationGAE, and GNNImpute on eight scRNA-Seq datasets with 40% masking rate. All of the results undergo dimensionality reduction to 40 dimensions, and the number of neighbors is set to 30.
